# Supplementary material for: A Kinetic Model of Dopamine- and Calcium-Dependent Striatal Synaptic Plasticity
Source: PLoS Comput Biol. 2010 Feb 12;6(2):e1000670. doi: 10.1371/journal.pcbi.1000670 (PMC2820521; doi:10.1371/journal.pcbi.1000670)
Supplement: Table S1 — Initial concentrations (0.03 MB XLS) [file pcbi.1000670.s003.xls]

## Sheet: Species
Table S1. Initial concentrations
Group	Name	InitialConc (uM)	Note	Reference
PKA	R2C2	3.5893		Estimated
	R2C2_cAMP2	0.10292
	R2C2_cAMP4	0.0048783
	R2_cAMP4	0.68822
	PKA_active	0.064572
	PKA_D75	1.2272
	PKA_D75_137	0.048046
PP1	PP1_active	2.3017		[68]
	PP1_D34	0.24255
	PP1_D34_137	0.03326
	PP1_D34_75	5.3027e-05
	PP1_D34_75_137	7.841e-06
	PP1_D	0.24318
	PP1_D75	5.3166e-05
	PP1_D137	0.0098078
	PP1_D75_137	2.3122e-06
I1	I1	0.68337		[68]
	PP1_I1	0.012345
	PP1_I1_p	2.1988
	I1_p	0.00067263
PP2B	CaNAB	0.2689		[68]
	CaNAB_Ca2	9.6885
	CaNAB_Ca4	0.12557
	CaMCa4_CaNAB	0.00095452
	CaMCa3_CaNAB	0.012762
	CaMCA2_CaNAB	0.0063358
CaMKII	CaMKII	18.893		[68]
	CaMKII_CaM	0.0029047
	CaMKII_Thr286	0.32935
	CaMKII_Thr306	0.0133
	tot_CaM_CaMKII	0.019097	CaMKII_CaM + CaMKII_Thr286p_CaM
	tot_autonomous_CaMKII	0.34265	CaMKII_Thr286_305 + CaMKII_Thr286
	CaMKII_act	0.36175	tot_CaM_CaMKII + tot_autonomous_CaMKII
	CaMKII_Thr286p_CaM	0.016192
	CaMKII_Thr286_305	0.0133
	basal_CaMKII	2
CaM	CaM_TR2_Ca2	0.21023		Estimated
	CaM_Ca3	0.0045412
	CaM	58.4
	CaM_Ca4	1.267e-05
		58.6148
DARPP-32	D	34.97		[66]
	D34	0.010776
	D137	1.3691
	D75	9.915
	D34_75	2.3558e-06
	D34_137	0.00045502
	D34_75_137	1.0727e-07
	D75_137	0.3882
PP2A	B1	2.365		[68]
	B2	2.1008
	PP2A_PKA	0.0088947
	PP2A_Ca	0.0012124
	B1_2Ca	0.00034908
	PP2A	0.41675
	B2p	0.019613
GluR	GluR	0.017575		Estimated
	GluR_845p	0.0082997
	GluR_831p_845p	0.0014591
	GluR_I_831p_845p	0.0070782
	GluR_I_845p	0.07443
	GluR_I	0.162
	Bulk_AMPAR	8.9998	buffered
	Anchor	11.563
DR	D1R	0.061372		Estimated
	D1R_Gs	0.43747
	D1R_DA	0.00098913
	D1R_DA_Gs	0.00053575
	Gs_GDP	2.5368
	bc	0.025623
	Gsa_GTP	0.0010715
	Gsa_GDP	0.0041815
AC	AC	2.3355		[22]
	AC_Gsa	0.001927
	cAMP	0.2217
	ATP	2000	buffered
	AC_Ca	0.1557
	ACGsa_Ca	0.00012813
	ACGsa_Ca_ATP	0.0010709
	AC_Gsa_ATP	0.017178
PDE	PDE2	1.1107		[22]
	PDE2_p	0.86065
	PDE1	3.98
	PDE1_CaM	5.0427e-06
PP2C	PP2C	1.258		Estimated
CK1	CK1p	0.47633		Estimated
	CK1	0.018607
Cdk5	CDK5p	0.068757		Estimated
	CDK5	0.49887
